# Supplementary material
Source: HighWire-hosted journal article supplement (https://tobaccocontrol.bmj.com/content/33/e1/e25)
Supplement: inline-supplementary-material-1 [file inline-supplementary-material-1.pdf]

### **Supplementary File 1: Eligibility Survey**

---

Start of Block: Default Question Block

#### **Reducing Tobacco Retail Outlets: Interviews**

##### **\*Eligibility Questionnaire\***

To check whether we're able to interview you, we'd like to ask you a few questions about yourself. Please remember that your responses will be kept confidential and you will not be personally identified in any research reports or publications.

---

**1. How old were you when you had your first puff on a cigarette?**

---

**2. How old were you when you first started to smoke cigarettes at least once a week?**

---

**3. For about how many years have you smoked at least one cigarette each day?**

---

**4. On average, how many cigarettes do you smoke each day?**

---

**5. How soon after waking up do you have your first cigarette?**

- Within 5 minutes (1)
- 6 - 30 minutes (2)
- 31 -60 minutes (3)
- After 60 minutes (4)
- 

**6. What are the main shops where you currently purchase tobacco?**

*These are shops where you would buy tobacco at least once a week.*

*Please write the store names, streets, suburbs and city below*

**Example store:**            **Four Square, Forbury Road, St Clair, Dunedin**

- Main store 1 (4) \_\_\_\_\_
- Main shop 2 (5) \_\_\_\_\_
- Main shop 3 (6) \_\_\_\_\_
- Main shop 4 (7) \_\_\_\_\_
- Main shop 5 (8) \_\_\_\_\_
- 

**7. Have you ever deliberately tried to quit smoking for at least 24 hours? (i.e., you chose to not smoke for at least 24 hours)**

- Yes, within the last 6 months (1)
- Yes, more than 6 months ago (2)
- No, I have never tried to quit smoking for more than 24 hours (3)
-

**8. If you wish to be interviewed and are eligible, how will you take part in this interview?**

- By phone - audio/voice only (1)
- By phone- audio and video (2)
- Using a tablet (3)
- Using a laptop or PC (4)
- 

**9. What is your date of birth?**

*dd/mm/yyyy*

---

**10. Which of these do you most identify with?**

- Male (1)
- Female (2)
- Gender diverse (3)
-

**11. Which ethnic group(s) do you identify with?*****Please tick all that apply***

- New Zealand European (1)
- Māori (2)
- Samoan (3)
- Cook Island Māori (4)
- Tongan (5)
- Niuean (6)
- Chinese (7)
- Indian (8)
- Other (such as Dutch, Japanese, Tokelauan) (9)
- 

-----

**So we can contact you, what is your phone number?**

---

-----

**What is your email address?**

---

**What is the best way to get in touch with you?**

Email (4)

Phone (5)

---

**Thank you for your help with our research**

**Please click on the arrow to record your answers**

End of Block: Default Question Block

---
